# Supplementary material
Source: ML conference proceedings conference paper supplement (https://openaccess.thecvf.com/content/CVPR2024/html/Xing_Enhancing_Quality_of_CVPR_2024_paper.html)
Supplement: Supplementary file [file Xing_Enhancing_Quality_of_CVPR_2024_supplemental.pdf]

# Enhancing Quality of Compressed Images by Mitigating Enhancement Bias Towards Compression Domain

## Supplementary Material

| Meth. | Data.    | Raw  | Enh. | $\Delta$<br>to raw | Comp. | $\Delta$<br>to raw |
|-------|----------|------|------|--------------------|-------|--------------------|
| [14]  | DIV2K    | 0.51 | 0.49 | <b>-0.02</b>       | 0.67  | <b>+0.16</b>       |
|       | Flickr2K | 0.51 | 0.49 | <b>-0.02</b>       | 0.66  | <b>+0.15</b>       |
| [15]  | DIV2K    | 0.66 | 0.33 | <b>-0.33</b>       | 0.71  | <b>+0.05</b>       |
|       | Flickr2K | 0.62 | 0.31 | <b>-0.31</b>       | 0.64  | <b>+0.02</b>       |

Table 1. Discriminator-evaluated realism scores for raw, enhanced, and compressed images. Higher scores indicate greater perceived realism. The results reveal that existing methods regard compressed images as more realistic than raw images.

### 1. Further Analysis of Enhancement Bias Towards Compression Domain

In the main paper, our findings for BPG-compressed images with QP set to 37 highlighted the prevalent enhancement bias towards the compression domain. To extend this investigation, this section presents analogous observations for JPEG-compressed images with a QF of 30, considering the widespread use of both BPG and JPEG codecs in image compression.

As delineated in Tab. 1, while discriminators effectively differentiate between enhanced and raw images, assigning higher realism scores to the latter, a notable difficulty arises in distinguishing compressed images from raw ones. More strikingly, compressed images receive higher realism scores than their raw counterparts. This trend signifies a perceived realism in the compression domain, thereby inadvertently contributing to the enhancement bias towards this domain.

Fig. 1 illustrates a consistent pattern where the enhancement domain more closely aligns with the compression domain rather than the raw domain. Horizontal deviations, ranging from -2.52% to -26.03%, further corroborate the widespread bias towards the compression domain across various datasets and metrics.

### 2. Extended Results of Objective Quality Evaluation

The main paper detailed the objective quality results of enhanced BPG-compressed images with QP set to 37. We now present, in Tabs. 2 to 5, the objective quality for other QP settings and JPEG-compressed images. Consistently, our method shows enhancement over perception-driven SR baselines [14, 15] across all evaluated metrics. Despite these baselines outperforming traditional fidelity-oriented

methods in most aspects, they generally lag in PSNR, a metric not entirely aligned with perceptual quality as noted by [1]. However, our method successfully boosts the PSNR performance of these baselines, marking a significant advancement in the field of perception-driven quality enhancement. In essence, our approach not only achieves state-of-the-art performance in perceptual quality enhancement of compressed images but also substantially improves fidelity as achieved by SR baseline methods.

### 3. Additional Evaluation of Rate-Distortion Performance

Building on the main paper’s rate-distortion performance analysis using FID and LPIPS, Fig. 2 extends this evaluation to additional metrics for both BPG-compressed and JPEG-compressed images. Our method’s rate-distortion curves consistently outperform those of the compared methods, underscoring superior image quality enhancement across various codecs and bitrates.

Additionally, we assess the rate-distortion performance using the BD-BR metric for JPEG-compressed images, supplementing the BPG-focused analysis in the main paper. As depicted in Tab. 6, our approach achieves significant bitrate reductions while preserving perceptual quality, evident in the minimal BD-BR values. Notably, even when considering PSNR, our method records a baseline performance enhancement of at least 2.73%. Overall, this comprehensive analysis affirms our method’s advancement in both rate-perception and rate-fidelity performance.

### 4. Additional Visual Demonstrations

To further illustrate the impact of our method in mitigating enhancement bias, Figs. 3 and 4 provide additional visual demonstrations. Compared methods often exhibit a stronger resemblance of enhanced images to their compressed counterparts, as evidenced by weaker residuals. In contrast, our method distinctly generates images with more vivid details, closely mirroring the residuals of raw images.

### References

- [1] Yochai Blau and Tomer Michaeli. The perception-distortion tradeoff. In *2018 IEEE/CVF conference on computer vision and pattern recognition*. IEEE, 2018. 1
- [2] Yochai Blau, Roey Mechrez, Radu Timofte, Tomer Michaeli, and Lihi Zelnik-Manor. The 2018 PIRM Challenge on Perceptual Image Super-Resolution. In *Proceedings of the Eu-*

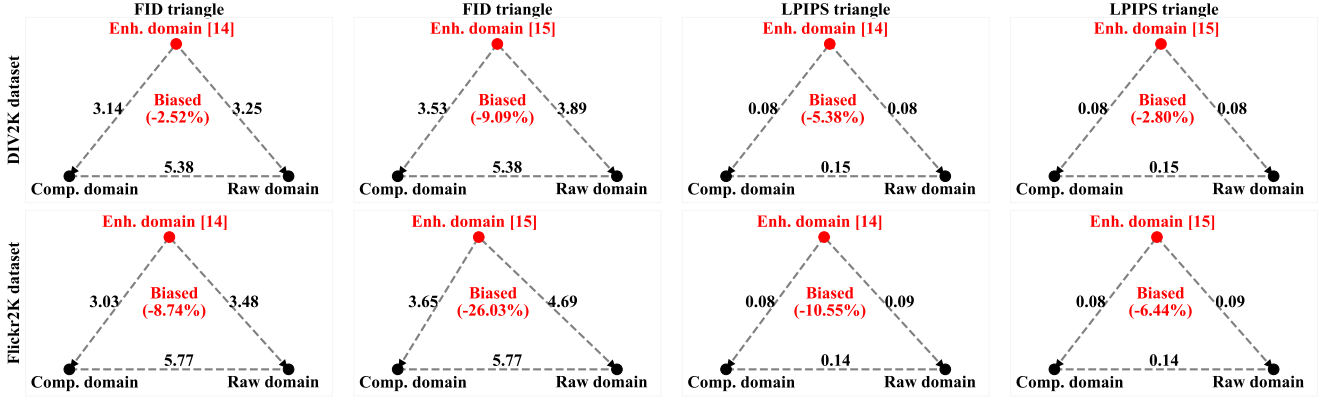

Figure 1. Similarity scores between compression, raw, and enhancement domains. Lower FID and LPIPS scores indicate greater similarity. The horizontal deviation of each vertex relative to the centroid of its base, calculated with float precision on original data, is also shown. The results underscore the enhancement bias, demonstrating a closer alignment of the enhancement domain with the compression domain than with the raw domain.

| QP          | Metric        | Comp. | [5]  | [13] | [18] | [6]         | [20] | [16] | [17] | [14] | [15]        | Ours w/ [14] | Ours w/ [15] |
|-------------|---------------|-------|------|------|------|-------------|------|------|------|------|-------------|--------------|--------------|
| 27          | ↑ AHIQ [9]    | .513  | .529 | .534 | .533 | .534        | .530 | .532 | .534 | .510 | .518        | .525         | <b>.535</b>  |
|             | ↑ CLIP. [12]  | .620  | .647 | .646 | .645 | .648        | .645 | .646 | .644 | .661 | .658        | <b>.670</b>  | .668         |
|             | ↓ DISTS [4]   | .058  | .060 | .066 | .066 | .065        | .066 | .066 | .065 | .026 | .025        | .024         | <b>.024</b>  |
|             | ↓ FID [7]     | 1.68  | 1.69 | 1.71 | 1.76 | 1.84        | 1.76 | 1.81 | 1.78 | 2.02 | 2.15        | <b>1.67</b>  | 1.90         |
|             | ↑ Hyper. [11] | .556  | .576 | .596 | .600 | .602        | .594 | .598 | .601 | .568 | .581        | .586         | <b>.602</b>  |
|             | ↓ LPIPS [19]  | .094  | .094 | .093 | .093 | .090        | .093 | .092 | .091 | .049 | .045        | .045         | <b>.043</b>  |
|             | ↑ MUSIQ [8]   | 66.2  | 66.7 | 67.1 | 67.1 | <b>67.1</b> | 67.0 | 67.0 | 67.0 | 65.0 | 65.6        | 65.6         | 66.3         |
|             | ↓ NIQE [10]   | 3.40  | 3.58 | 3.64 | 3.65 | 3.63        | 3.65 | 3.64 | 3.64 | 3.00 | 3.09        | <b>2.90</b>  | 2.91         |
|             | ↓ PI [2]      | 3.63  | 3.76 | 3.83 | 3.81 | 3.80        | 3.81 | 3.81 | 3.91 | 3.21 | 3.30        | <b>3.15</b>  | 3.18         |
|             | ↑ PSNR (dB)   | 35.9  | 36.5 | 36.7 | 36.8 | <b>37.0</b> | 36.8 | 36.9 | 37.0 | 34.1 | 34.8        | 34.7         | 35.5         |
| ↑ TOPIQ [3] | .917          | .918  | .918 | .918 | .920 | .918        | .919 | .920 | .928 | .929 | .931        | <b>.931</b>  |              |
| 32          | ↑ AHIQ [9]    | .482  | .495 | .503 | .501 | .504        | .502 | .503 | .503 | .489 | .491        | .502         | <b>.509</b>  |
|             | ↑ CLIP. [12]  | .571  | .606 | .609 | .610 | .618        | .608 | .611 | .611 | .666 | .656        | <b>.674</b>  | .668         |
|             | ↓ DISTS [4]   | .089  | .095 | .102 | .102 | .100        | .103 | .102 | .101 | .041 | .042        | <b>.038</b>  | .039         |
|             | ↓ FID [7]     | 4.51  | 4.66 | 4.68 | 4.77 | 4.86        | 4.78 | 4.72 | 4.73 | 4.36 | 5.63        | <b>3.87</b>  | 4.19         |
|             | ↑ Hyper. [11] | .515  | .553 | .577 | .581 | .588        | .582 | .581 | .583 | .566 | .573        | .584         | <b>.594</b>  |
|             | ↓ LPIPS [19]  | .149  | .146 | .146 | .145 | .141        | .145 | .143 | .142 | .078 | .077        | .073         | <b>.073</b>  |
|             | ↑ MUSIQ [8]   | 64.7  | 65.4 | 66.0 | 66.1 | 66.2        | 66.0 | 66.1 | 66.1 | 65.4 | 65.6        | 65.9         | <b>66.5</b>  |
|             | ↓ NIQE [10]   | 3.75  | 4.00 | 4.10 | 4.08 | 4.08        | 4.11 | 4.10 | 4.08 | 2.94 | 3.11        | <b>2.83</b>  | 2.89         |
|             | ↓ PI [2]      | 3.94  | 4.12 | 4.19 | 4.17 | 4.18        | 4.19 | 4.18 | 4.27 | 3.19 | 3.36        | <b>3.13</b>  | 3.19         |
|             | ↑ PSNR (dB)   | 33.3  | 33.8 | 34.0 | 34.1 | <b>34.3</b> | 34.1 | 34.2 | 34.2 | 31.7 | 32.3        | 32.2         | 33.2         |
| ↑ TOPIQ [3] | .859          | .856  | .855 | .855 | .860 | .854        | .857 | .860 | .894 | .896 | <b>.902</b> | .901         |              |

Table 2. Objective quality of enhanced BPG-compressed images with QP set to 27 and 32. All results are to three significant figures.

- ropean Conference on Computer Vision (ECCV) Workshops, 2018. 2, 3, 4
- [3] Chaofeng Chen, Jiadi Mo, Jingwen Hou, Haoning Wu, Liang Liao, Wenxiu Sun, Qiong Yan, and Weisi Lin. TOPIQ: A Top-down Approach from Semantics to Distortions for Image Quality Assessment, 2023. arXiv:2308.03060 [cs]. 2, 3, 4
- [4] Keyan Ding, Kede Ma, Shiqi Wang, and Eero P. Simoncelli. Image Quality Assessment: Unifying Structure and Texture Similarity. *IEEE Transactions on Pattern Analysis and Machine Intelligence*, pages 1–1, 2020. arXiv:2004.07728 [cs]. 2, 3, 4
- [5] Chao Dong, Yubin Deng, Chen Change Loy, and Xiaoou Tang. Compression artifacts reduction by a deep convolutional network. In *2015 IEEE international conference on computer vision (ICCV)*. IEEE, 2015. 2, 3, 4
- [6] Shi Guo, Zifei Yan, Kai Zhang, Wangmeng Zuo, and Lei Zhang. Toward convolutional blind denoising of real pho-

| QP          | Metric        | Comp. | [5]  | [13] | [18] | [6]         | [20] | [16] | [17] | [14] | [15]        | Ours<br>w/[14] | Ours<br>w/[15] |  |
|-------------|---------------|-------|------|------|------|-------------|------|------|------|------|-------------|----------------|----------------|--|
| 42          | ↑ AHIQ [9]    | .371  | .370 | .372 | .375 | .384        | .375 | .381 | .380 | .394 | .401        | .414           | <b>.425</b>    |  |
|             | ↑ CLIP. [12]  | .397  | .441 | .464 | .471 | .515        | .479 | .487 | .490 | .651 | .631        | <b>.660</b>    | .645           |  |
|             | ↓ DISTS [4]   | .170  | .179 | .186 | .186 | .183        | .188 | .186 | .185 | .088 | .098        | <b>.083</b>    | .092           |  |
|             | ↓ FID [7]     | 20.7  | 22.2 | 22.7 | 23.3 | 24.0        | 23.1 | 23.2 | 23.1 | 15.7 | 21.0        | <b>15.1</b>    | 17.5           |  |
|             | ↑ Hyper. [11] | .379  | .451 | .484 | .492 | .518        | .492 | .494 | .500 | .548 | .545        | <b>.572</b>    | .568           |  |
|             | ↓ LPIPS [19]  | .313  | .304 | .302 | .300 | .292        | .302 | .297 | .294 | .194 | .181        | .180           | <b>.174</b>    |  |
|             | ↑ MUSIQ [8]   | 53.4  | 56.6 | 57.9 | 58.0 | 59.2        | 58.1 | 58.2 | 58.6 | 64.4 | 63.3        | <b>65.6</b>    | 65.0           |  |
|             | ↓ NIQE [10]   | 4.93  | 5.08 | 5.17 | 5.17 | 5.25        | 5.25 | 5.23 | 5.27 | 2.89 | 3.36        | <b>2.73</b>    | 3.10           |  |
|             | ↓ PI [2]      | 4.96  | 5.04 | 5.08 | 5.08 | 5.11        | 5.13 | 5.10 | 5.14 | 3.21 | 3.62        | <b>3.09</b>    | 3.40           |  |
|             | ↑ PSNR (dB)   | 28.3  | 28.7 | 28.8 | 28.9 | <b>29.1</b> | 28.9 | 29.0 | 29.0 | 26.4 | 27.3        | <b>27.0</b>    | 28.0           |  |
| ↑ TOPIQ [3] | .532          | .539  | .542 | .543 | .558 | .542        | .547 | .551 | .652 | .655 | <b>.673</b> | .672           |                |  |
| 47          | ↑ AHIQ [9]    | .295  | .287 | .288 | .292 | .302        | .292 | .298 | .299 | .305 | .338        | .332           | <b>.360</b>    |  |
|             | ↑ CLIP. [12]  | .295  | .340 | .367 | .373 | .443        | .400 | .418 | .409 | .616 | .621        | .632           | <b>.636</b>    |  |
|             | ↓ DISTS [4]   | .223  | .229 | .234 | .234 | .234        | .238 | .236 | .236 | .127 | .144        | <b>.119</b>    | .133           |  |
|             | ↓ FID [7]     | 43.3  | 46.5 | 47.8 | 48.6 | 51.2        | 48.5 | 51.4 | 49.2 | 35.0 | 43.1        | <b>31.6</b>    | 38.1           |  |
|             | ↑ Hyper. [11] | .305  | .372 | .406 | .410 | .444        | .418 | .424 | .427 | .543 | .539        | <b>.568</b>    | .564           |  |
|             | ↓ LPIPS [19]  | .432  | .410 | .404 | .402 | .394        | .405 | .399 | .396 | .294 | .266        | .276           | <b>.255</b>    |  |
|             | ↑ MUSIQ [8]   | 42.9  | 48.4 | 49.9 | 50.2 | 51.9        | 50.4 | 50.8 | 51.4 | 62.7 | 61.5        | <b>64.3</b>    | 63.6           |  |
|             | ↓ NIQE [10]   | 6.08  | 5.84 | 5.86 | 5.89 | 6.03        | 6.01 | 6.01 | 6.05 | 2.80 | 3.50        | <b>2.62</b>    | 3.25           |  |
|             | ↓ PI [2]      | 5.91  | 5.78 | 5.77 | 5.79 | 5.85        | 5.85 | 5.85 | 5.88 | 3.16 | 3.82        | <b>3.02</b>    | 3.54           |  |
|             | ↑ PSNR (dB)   | 25.9  | 26.2 | 26.3 | 26.4 | <b>26.5</b> | 26.4 | 26.5 | 26.5 | 23.6 | 25.0        | <b>24.1</b>    | 25.5           |  |
| ↑ TOPIQ [3] | .389          | .411  | .418 | .421 | .434 | .419        | .426 | .428 | .478 | .503 | .492        | <b>.516</b>    |                |  |

Table 3. Objective quality of enhanced BPG-compressed images with QP set to 42 and 47. All results are to three significant figures.

| QP          | Metric        | Comp. | [5]  | [13] | [18] | [6]         | [20] | [16] | [17] | [14] | [15]        | Ours<br>w/[14] | Ours<br>w/[15] |  |
|-------------|---------------|-------|------|------|------|-------------|------|------|------|------|-------------|----------------|----------------|--|
| 10          | ↑ AHIQ [9]    | .388  | .406 | .419 | .421 | .436        | .427 | .432 | .431 | .432 | .438        | .451           | <b>.464</b>    |  |
|             | ↑ CLIP. [12]  | .463  | .470 | .489 | .503 | .537        | .509 | .516 | .502 | .654 | .640        | <b>.666</b>    | .653           |  |
|             | ↓ DISTS [4]   | .225  | .164 | .168 | .167 | .159        | .171 | .166 | .163 | .075 | .081        | <b>.072</b>    | .078           |  |
|             | ↓ FID [7]     | 30.7  | 24.1 | 21.8 | 20.8 | 17.8        | 20.5 | 17.1 | 17.4 | 15.3 | 18.1        | <b>14.7</b>    | 15.4           |  |
|             | ↑ Hyper. [11] | .352  | .405 | .441 | .451 | .499        | .463 | .476 | .474 | .549 | .560        | .570           | <b>.579</b>    |  |
|             | ↓ LPIPS [19]  | .323  | .272 | .269 | .266 | .251        | .266 | .257 | .254 | .155 | .147        | .146           | <b>.140</b>    |  |
|             | ↑ MUSIQ [8]   | 47.5  | 56.5 | 59.1 | 59.4 | 61.3        | 59.8 | 60.1 | 60.5 | 64.8 | 64.5        | 65.7           | <b>65.9</b>    |  |
|             | ↓ NIQE [10]   | 6.49  | 4.76 | 4.70 | 4.71 | 4.83        | 4.78 | 4.84 | 4.81 | 2.86 | 3.18        | <b>2.72</b>    | 2.94           |  |
|             | ↓ PI [2]      | 5.39  | 4.69 | 4.68 | 4.67 | 4.74        | 4.72 | 4.73 | 4.73 | 3.15 | 3.49        | <b>3.07</b>    | 3.26           |  |
|             | ↑ PSNR (dB)   | 27.1  | 28.6 | 28.8 | 28.9 | <b>29.3</b> | 29.0 | 29.2 | 29.2 | 26.8 | 27.8        | <b>27.3</b>    | 28.2           |  |
| ↑ TOPIQ [3] | .481          | .627  | .644 | .649 | .673 | .647        | .657 | .663 | .751 | .746 | .766        | <b>.768</b>    |                |  |
| 20          | ↑ AHIQ [9]    | .450  | .468 | .486 | .483 | .495        | .485 | .486 | .486 | .483 | .478        | .499           | <b>.500</b>    |  |
|             | ↑ CLIP. [12]  | .604  | .563 | .576 | .585 | .599        | .582 | .585 | .583 | .663 | .647        | <b>.675</b>    | .661           |  |
|             | ↓ DISTS [4]   | .146  | .122 | .126 | .124 | .117        | .127 | .123 | .120 | .048 | .051        | <b>.046</b>    | .048           |  |
|             | ↓ FID [7]     | 10.7  | 8.27 | 7.24 | 6.90 | 6.02        | 7.05 | 6.05 | 6.56 | 6.13 | 6.95        | <b>5.40</b>    | 5.50           |  |
|             | ↑ Hyper. [11] | .396  | .465 | .506 | .514 | .541        | .516 | .520 | .523 | .564 | .569        | .582           | <b>.591</b>    |  |
|             | ↓ LPIPS [19]  | .207  | .193 | .188 | .186 | .176        | .187 | .182 | .178 | .090 | .088        | .085           | <b>.083</b>    |  |
|             | ↑ MUSIQ [8]   | 57.4  | 62.5 | 64.0 | 64.3 | 65.0        | 64.3 | 64.5 | 64.6 | 65.4 | 65.3        | 65.9           | <b>66.5</b>    |  |
|             | ↓ NIQE [10]   | 4.90  | 4.32 | 4.30 | 4.29 | 4.36        | 4.35 | 4.34 | 4.34 | 2.94 | 3.11        | <b>2.82</b>    | 2.88           |  |
|             | ↓ PI [2]      | 4.48  | 4.30 | 4.29 | 4.27 | 4.33        | 4.32 | 4.31 | 4.32 | 3.17 | 3.39        | <b>3.11</b>    | 3.19           |  |
|             | ↑ PSNR (dB)   | 29.6  | 31.0 | 31.3 | 31.5 | <b>31.8</b> | 31.4 | 31.6 | 31.6 | 29.3 | 30.1        | <b>29.8</b>    | 30.6           |  |
| ↑ TOPIQ [3] | .714          | .798  | .809 | .813 | .829 | .810        | .818 | .823 | .870 | .865 | <b>.880</b> | .878           |                |  |

Table 4. Objective quality of enhanced JPEG-compressed images with QF set to 10 and 20. All results are to three significant figures.

| QF          | Metric        | Comp. | [5]  | [13] | [18] | [6]         | [20] | [16] | [17] | [14] | [15]        | Ours<br>w/[14] | Ours<br>w/[15] |
|-------------|---------------|-------|------|------|------|-------------|------|------|------|------|-------------|----------------|----------------|
| 30          | ↑ AHIQ [9]    | .479  | .497 | .509 | .510 | .517        | .512 | .508 | .510 | .498 | .498        | .511           | <b>.518</b>    |
|             | ↑ CLIP. [12]  | .637  | .601 | .610 | .617 | .623        | .614 | .616 | .615 | .663 | .649        | <b>.672</b>    | .662           |
|             | ↓ DISTS [4]   | .112  | .100 | .103 | .102 | .095        | .103 | .101 | .099 | .037 | .038        | <b>.035</b>    | .035           |
|             | ↓ FID [7]     | 5.38  | 4.24 | 3.65 | 3.41 | 3.16        | 3.53 | 3.23 | 3.60 | 3.25 | 3.89        | <b>2.85</b>    | 3.17           |
|             | ↑ Hyper. [11] | .433  | .493 | .531 | .538 | .554        | .539 | .541 | .542 | .564 | .568        | .580           | <b>.589</b>    |
|             | ↓ LPIPS [19]  | .154  | .155 | .150 | .149 | .141        | .149 | .145 | .145 | .084 | .081        | .059           | <b>.057</b>    |
|             | ↑ MUSIQ [8]   | 60.9  | 64.6 | 65.7 | 65.9 | <b>66.3</b> | 65.8 | 65.9 | 65.9 | 65.1 | 65.3        | 65.5           | 66.1           |
|             | ↓ NIQE [10]   | 4.22  | 4.12 | 4.08 | 4.08 | 4.11        | 4.11 | 4.11 | 4.10 | 3.02 | 3.10        | 2.91           | <b>2.90</b>    |
|             | ↓ PI [2]      | 4.07  | 4.10 | 4.09 | 4.09 | 4.10        | 4.11 | 4.09 | 4.11 | 3.21 | 3.35        | <b>3.16</b>    | 3.18           |
|             | ↑ PSNR (dB)   | 30.9  | 32.3 | 32.7 | 32.8 | <b>33.1</b> | 32.8 | 33.0 | 33.0 | 30.6 | 31.3        | 31.1           | 31.8           |
| ↑ TOPIQ [3] | .820          | .862  | .870 | .872 | .882 | .870        | .876 | .878 | .906 | .901 | <b>.911</b> | .910           |                |
| 40          | ↑ AHIQ [9]    | .493  | .512 | .523 | .524 | .528        | .524 | .523 | .523 | .507 | .508        | .520           | <b>.529</b>    |
|             | ↑ CLIP. [12]  | .645  | .620 | .627 | .629 | .634        | .630 | .631 | .629 | .664 | .653        | <b>.673</b>    | .663           |
|             | ↓ DISTS [4]   | .094  | .086 | .089 | .089 | .082        | .089 | .087 | .085 | .029 | .030        | <b>.027</b>    | .028           |
|             | ↓ FID [7]     | 3.16  | 2.52 | 2.16 | 2.10 | 1.94        | 2.21 | 2.05 | 2.19 | 2.15 | 2.58        | <b>1.92</b>    | 2.10           |
|             | ↑ Hyper. [11] | .451  | .508 | .545 | .550 | .563        | .548 | .548 | .546 | .565 | .572        | .583           | <b>.591</b>    |
|             | ↓ LPIPS [19]  | .125  | .131 | .127 | .126 | .118        | .126 | .123 | .124 | .049 | .048        | .046           | <b>.045</b>    |
|             | ↑ MUSIQ [8]   | 62.5  | 65.4 | 66.3 | 66.4 | <b>66.7</b> | 66.5 | 66.5 | 66.3 | 65.3 | 65.4        | 65.6           | 66.1           |
|             | ↓ NIQE [10]   | 3.82  | 3.93 | 3.88 | 3.89 | 3.92        | 3.91 | 3.88 | 3.93 | 3.07 | 3.13        | 2.96           | <b>2.92</b>    |
|             | ↓ PI [2]      | 3.81  | 3.95 | 3.94 | 3.93 | 3.95        | 3.95 | 3.94 | 4.04 | 3.25 | 3.35        | <b>3.19</b>    | 3.19           |
|             | ↑ PSNR (dB)   | 31.8  | 33.2 | 33.6 | 33.7 | <b>34.0</b> | 33.7 | 33.8 | 33.8 | 31.5 | 32.2        | 31.9           | 32.7           |
| ↑ TOPIQ [3] | .869          | .891  | .896 | .897 | .905 | .897        | .901 | .901 | .920 | .917 | <b>.923</b> | .923           |                |
| 50          | ↑ AHIQ [9]    | .503  | .523 | .532 | .535 | .537        | .531 | .533 | .533 | .514 | .514        | .525           | <b>.538</b>    |
|             | ↑ CLIP. [12]  | .644  | .631 | .638 | .641 | .642        | .639 | .640 | .638 | .664 | .653        | <b>.673</b>    | .664           |
|             | ↓ DISTS [4]   | .082  | .076 | .078 | .076 | .071        | .077 | .076 | .074 | .024 | .025        | <b>.023</b>    | .023           |
|             | ↓ FID [7]     | 2.13  | 1.78 | 1.56 | 1.57 | 1.44        | 1.54 | 1.64 | 1.67 | 1.55 | 1.96        | <b>1.32</b>    | 1.56           |
|             | ↑ Hyper. [11] | .472  | .521 | .554 | .555 | .566        | .558 | .560 | .550 | .567 | .574        | .584           | <b>.591</b>    |
|             | ↓ LPIPS [19]  | .103  | .114 | .109 | .107 | .101        | .108 | .105 | .107 | .042 | .040        | .038           | <b>.037</b>    |
|             | ↑ MUSIQ [8]   | 63.4  | 65.9 | 66.7 | 66.8 | <b>66.9</b> | 66.7 | 66.8 | 66.5 | 65.2 | 65.4        | 65.6           | 66.1           |
|             | ↓ NIQE [10]   | 3.48  | 3.79 | 3.75 | 3.75 | 3.77        | 3.76 | 3.78 | 3.94 | 3.09 | 3.12        | 2.99           | <b>2.96</b>    |
|             | ↓ PI [2]      | 3.62  | 3.84 | 3.81 | 3.81 | 3.82        | 3.82 | 3.82 | 3.84 | 3.25 | 3.33        | <b>3.20</b>    | 3.21           |
|             | ↑ PSNR (dB)   | 32.5  | 33.9 | 34.3 | 34.4 | <b>34.7</b> | 34.4 | 34.5 | 34.5 | 32.2 | 32.8        | 32.6           | 33.4           |
| ↑ TOPIQ [3] | .894          | .907  | .911 | .912 | .917 | .912        | .914 | .914 | .928 | .925 | <b>.930</b> | .929           |                |

Table 5. Objective quality of enhanced JPEG-compressed images with QF set to 30, 40, and 50. All results are to three significant figures.

| Metric      | [5]   | [13]  | [18]  | [6]          | [20]  | [16]  | [17]  | [14]  | [15]         | Ours<br>w/[14] | Ours<br>w/[15] |
|-------------|-------|-------|-------|--------------|-------|-------|-------|-------|--------------|----------------|----------------|
| AHIQ [9]    | -4.79 | -8.98 | -8.58 | -11.8        | -9.18 | -9.92 | -9.76 | -9.47 | -8.28        | -14.7          | <b>-14.8</b>   |
| CLIP. [12]  | +5.58 | +3.74 | +2.22 | -.292        | +2.62 | +2.09 | +2.52 | -99.8 | -22.2        | N/A            | -98.9          |
| DISTS [4]   | -5.80 | -4.95 | -5.39 | -7.23        | -4.81 | -5.63 | -6.26 | -29.5 | -27.5        | <b>-31.0</b>   | -28.8          |
| FID [7]     | -3.59 | -5.18 | -5.76 | -7.49        | -5.63 | -7.53 | -6.75 | -7.57 | -6.09        | <b>-8.81</b>   | -8.66          |
| Hyper. [11] | -14.6 | -22.5 | -24.1 | -30.1        | -25.8 | -28.1 | -27.7 | N/A   | N/A          | N/A            | N/A            |
| LPIPS [19]  | -2.31 | -2.92 | -3.23 | -4.63        | -3.09 | -3.82 | -4.19 | -21.5 | <b>-22.1</b> | -20.2          | -20.8          |
| MUSIQ [8]   | -12.2 | -16.7 | -17.4 | -21.3        | -17.9 | -18.5 | -19.5 | -74.1 | -80.6        | N/A            | N/A            |
| PSNR (dB)   | -8.02 | -9.65 | -10.3 | <b>-12.0</b> | -10.2 | -11.3 | -11.3 | +1.68 | -2.99        | -1.05          | -5.92          |
| TOPIQ [3]   | -6.65 | -7.65 | -7.94 | -9.45        | -7.72 | -8.45 | -8.88 | -13.8 | -13.3        | <b>-15.1</b>   | -14.9          |

Table 6. BD-BR (%) performance applied to JPEG-compressed images. Negative values indicate a reduction in bit rate for the same quality. The notation “N/A” is used where the output result is excessively large for presentation. All results are to three significant figures.



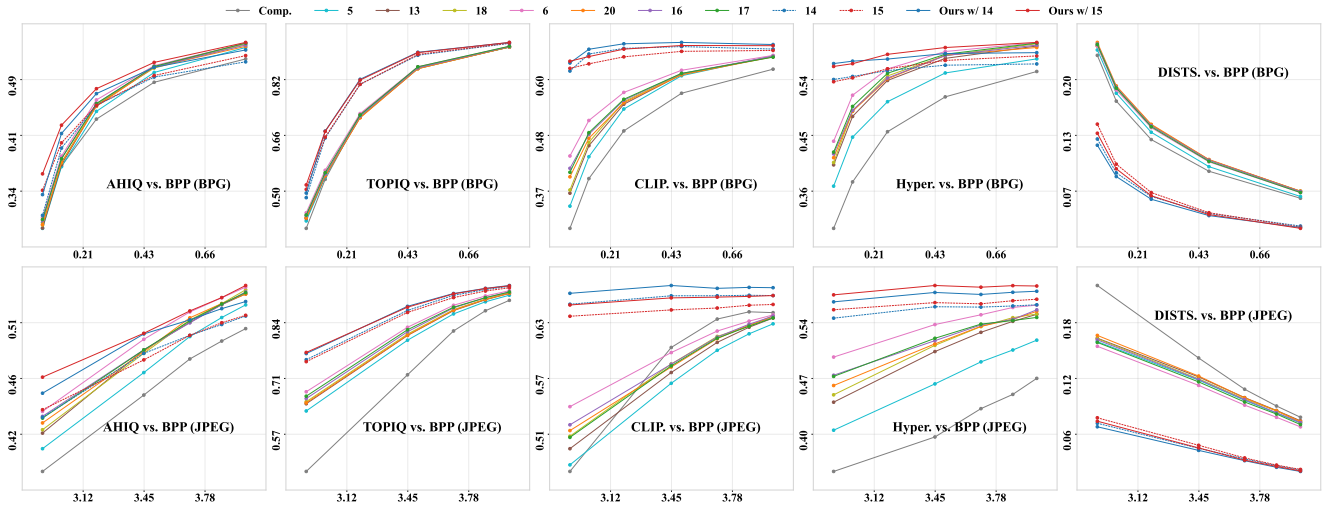

Figure 2. Rate-distortion curves comparing bits per pixel (BPP) against distortion measured by various metrics.

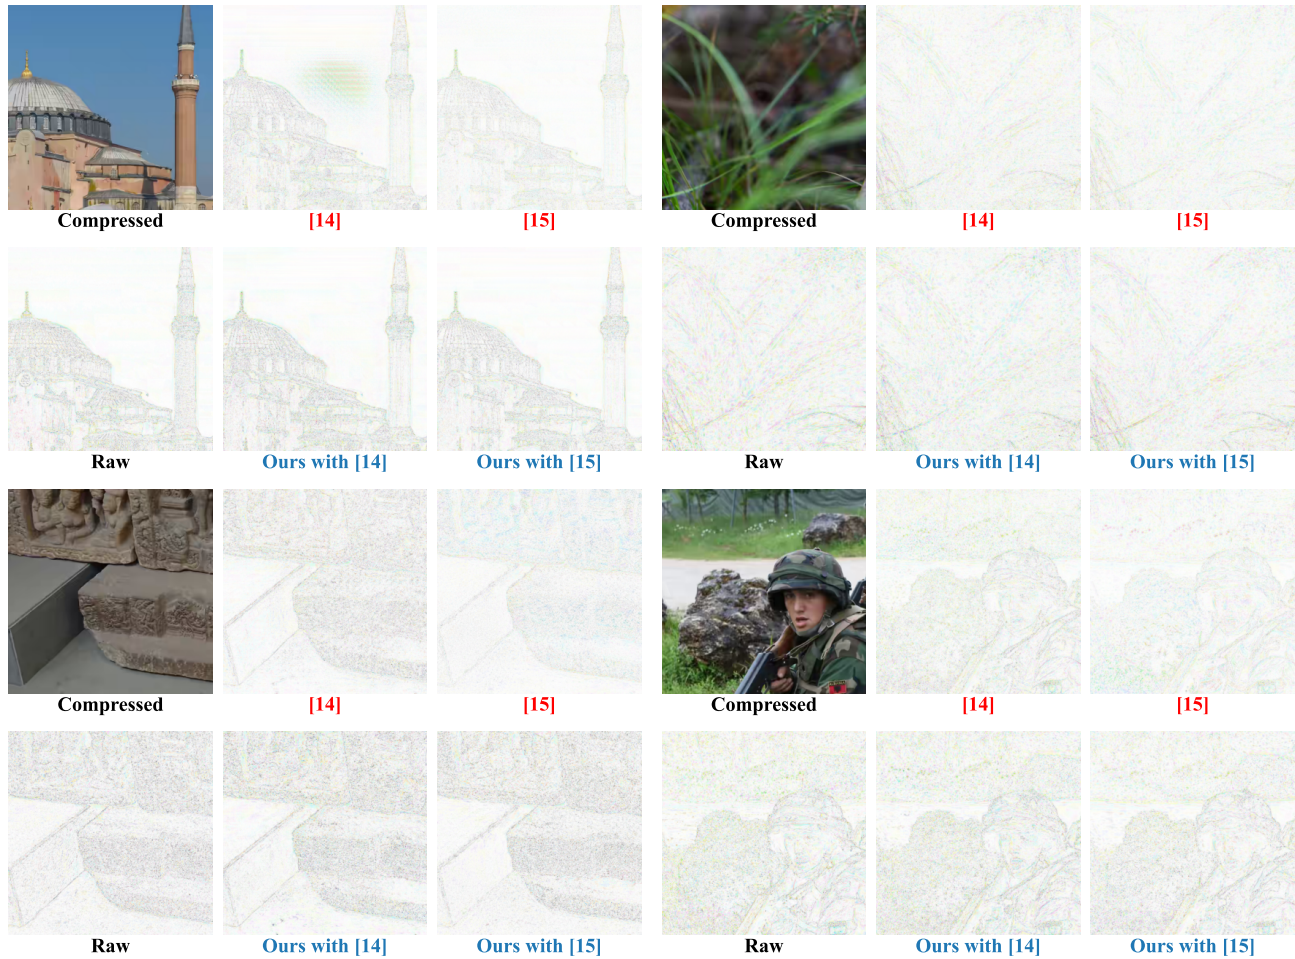

Figure 3. Visualization of residual to the compressed image.

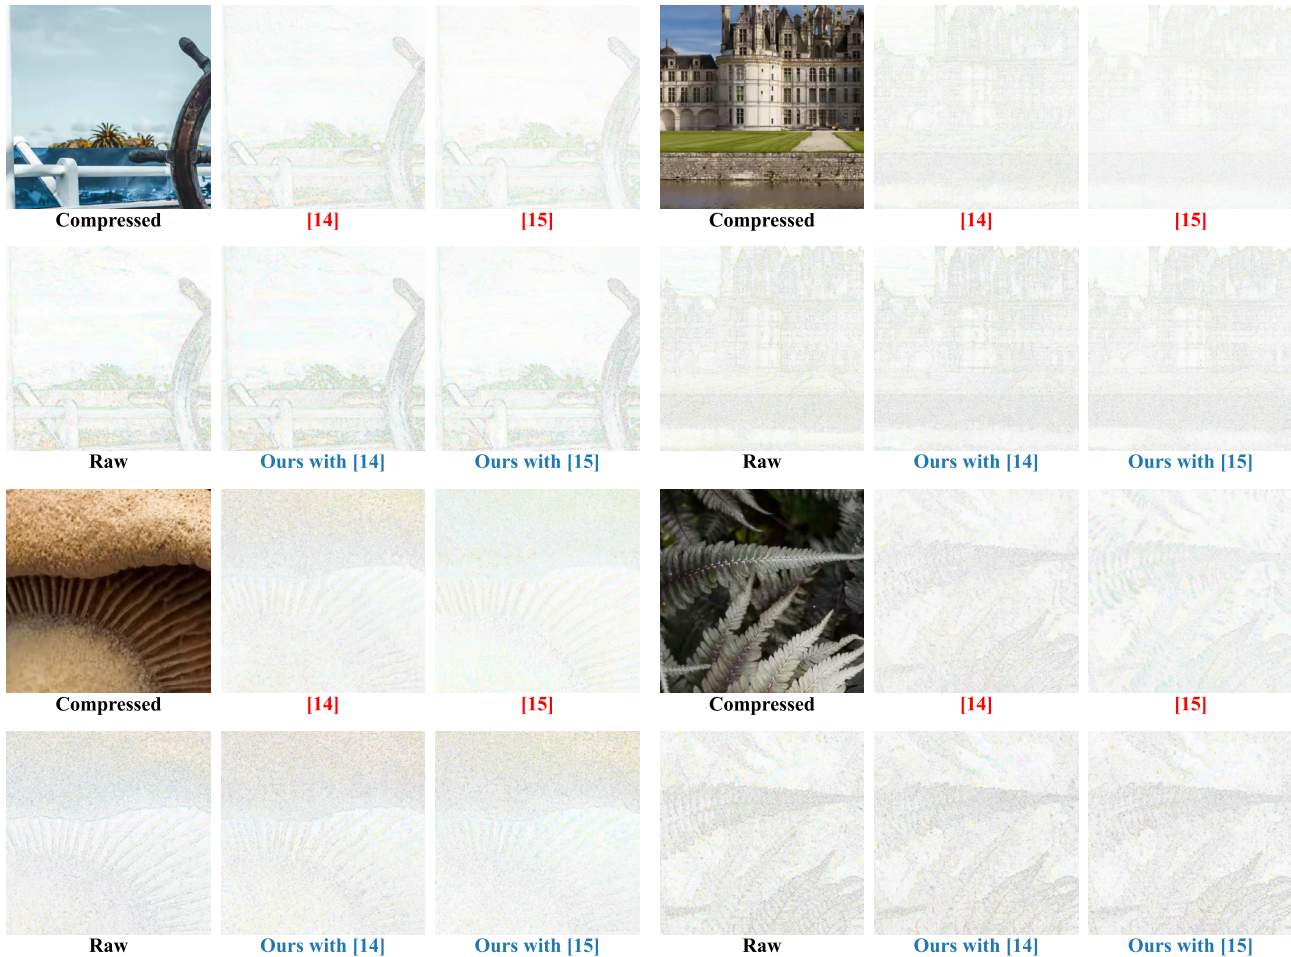

Figure 4. Visualization of residual to the compressed image.

- [7] Martin Heusel, Hubert Ramsauer, Thomas Unterthiner, Bernhard Nessler, and Sepp Hochreiter. GANs trained by a two time-scale update rule converge to a local nash equilibrium. In *Proceedings of the 31st international conference on neural information processing systems*, pages 6629–6640, Red Hook, NY, USA, 2017. Curran Associates Inc. Number of pages: 12 Place: Long Beach, California, USA. 2, 3, 4
- [8] Junjie Ke, Qifei Wang, Yilin Wang, Peyman Milanfar, and Feng Yang. MUSIQ: Multi-Scale Image Quality Transformer. In *Proceedings of the IEEE/CVF International Conference on Computer Vision (ICCV)*, pages 5148–5157, 2021. 2, 3, 4
- [9] Shanshan Lao, Yuan Gong, Shuwei Shi, Sidi Yang, Tianhe Wu, Jiahao Wang, Weihao Xia, and Yujiu Yang. Attentions Help CNNs See Better: Attention-Based Hybrid Image Quality Assessment Network. In *Proceedings of the IEEE/CVF Conference on Computer Vision and Pattern Recognition (CVPR) Workshops*, pages 1140–1149, 2022. 2, 3, 4
- [10] Anish Mittal, Rajiv Soundararajan, and Alan C. Bovik. Making a “Completely Blind” Image Quality Analyzer. *IEEE Signal Processing Letters*, 20(3):209–212, 2013. Conference Name: IEEE Signal Processing Letters. 2, 3, 4
- [11] Shaolin Su, Qingsen Yan, Yu Zhu, Cheng Zhang, Xin Ge, Jinqiu Sun, and Yanning Zhang. Blindly Assess Image Quality in the Wild Guided by a Self-Adaptive Hyper Network. In *2020 IEEE/CVF Conference on Computer Vision and Pattern Recognition (CVPR)*, pages 3664–3673, 2020. ISSN: 2575-7075. 2, 3, 4
- [12] Jianyi Wang, Kelvin C. K. Chan, and Chen Change Loy. Exploring CLIP for Assessing the Look and Feel of Images. *Proceedings of the AAAI Conference on Artificial Intelligence*, 37(2):2555–2563, 2023. Number: 2. 2, 3, 4
- [13] Tingting Wang, Mingjin Chen, and Hongyang Chao. A novel deep learning-based method of improving coding efficiency from the decoder-end for HEVC. In *2017 data compression conference (DCC)*. IEEE, 2017. 2, 3, 4
- [14] Xintao Wang, Ke Yu, Shixiang Wu, Jinjin Gu, Yihao Liu, Chao Dong, Yu Qiao, and Chen Change Loy. ESRGAN: Enhanced Super-Resolution Generative Adversarial Networks. In *Proceedings of the European Conference on Computer Vision (ECCV) Workshops*, 2018. 1, 2, 3, 4



- [15] Xintao Wang, Liangbin Xie, Chao Dong, and Ying Shan. Real-ESRGAN: Training Real-World Blind Super-Resolution With Pure Synthetic Data. In *Proceedings of the IEEE/CVF International Conference on Computer Vision (ICCV) Workshops*, pages 1905–1914, 2021. 1, 2, 3, 4
- [16] Qunliang Xing, Mai Xu, Tianyi Li, and Zhenyu Guan. Early exit or not: Resource-efficient blind quality enhancement for compressed images. In *Computer vision - ECCV 2020 - 16th european conference, glasgow, UK, august 23-28, 2020, proceedings, part XVI*, pages 275–292. Springer, 2020. tex.bibsource: dblp computer science bibliography, <https://dblp.org> tex.biburl: <https://dblp.org/rec/conf/eccv/XingXLG20.bib> tex.timestamp: Thu, 17 Feb 2022 16:43:16 +0100. 2, 3, 4
- [17] Syed Waqas Zamir, Aditya Arora, Salman H. Khan, Munawar Hayat, Fahad Shahbaz Khan, Ming-Hsuan Yang, and Ling Shao. Multi-stage progressive image restoration. In *IEEE conference on computer vision and pattern recognition, CVPR 2021, virtual, june 19-25, 2021*, pages 14821–14831. Computer Vision Foundation / IEEE, 2021. tex.bibsource: dblp computer science bibliography, <https://dblp.org> tex.biburl: <https://dblp.org/rec/conf/cvpr/ZamirA0HK0021.bib> tex.timestamp: Mon, 30 Aug 2021 17:00:27 +0200. 2, 3, 4
- [18] K. Zhang, W. Zuo, S. Gu, and L. Zhang. Learning Deep CNN Denoiser Prior for Image Restoration. In *2017 IEEE Conference on Computer Vision and Pattern Recognition (CVPR)*, pages 2808–2817, Los Alamitos, CA, USA, 2017. IEEE Computer Society. ISSN: 1063-6919. 2, 3, 4
- [19] Richard Zhang, Phillip Isola, Alexei A. Efros, Eli Shechtman, and Oliver Wang. The unreasonable effectiveness of deep features as a perceptual metric. In *2018 IEEE/CVF conference on computer vision and pattern recognition*. IEEE, 2018. 2, 3, 4
- [20] Yulun Zhang, Yapeng Tian, Yu Kong, Bineng Zhong, and Yun Fu. Residual Dense Network for Image Super-Resolution. In *Proceedings of the IEEE Conference on Computer Vision and Pattern Recognition (CVPR)*, 2018. 2, 3, 4
